# Supplementary material for: Disruption of C/EBPβ-Clec7a axis exacerbates neuroinflammatory injury via NLRP3 inflammasome-mediated pyroptosis in experimental neuropathic pain
Source: PubMed Central journal article supplement (PMC9743596; doi:10.1186/s12967-022-03779-9), 2022-12-12
Supplement: 12967_2022_3779_MOESM1_ESM.pdf [file 12967_2022_3779_MOESM1_ESM.pdf]

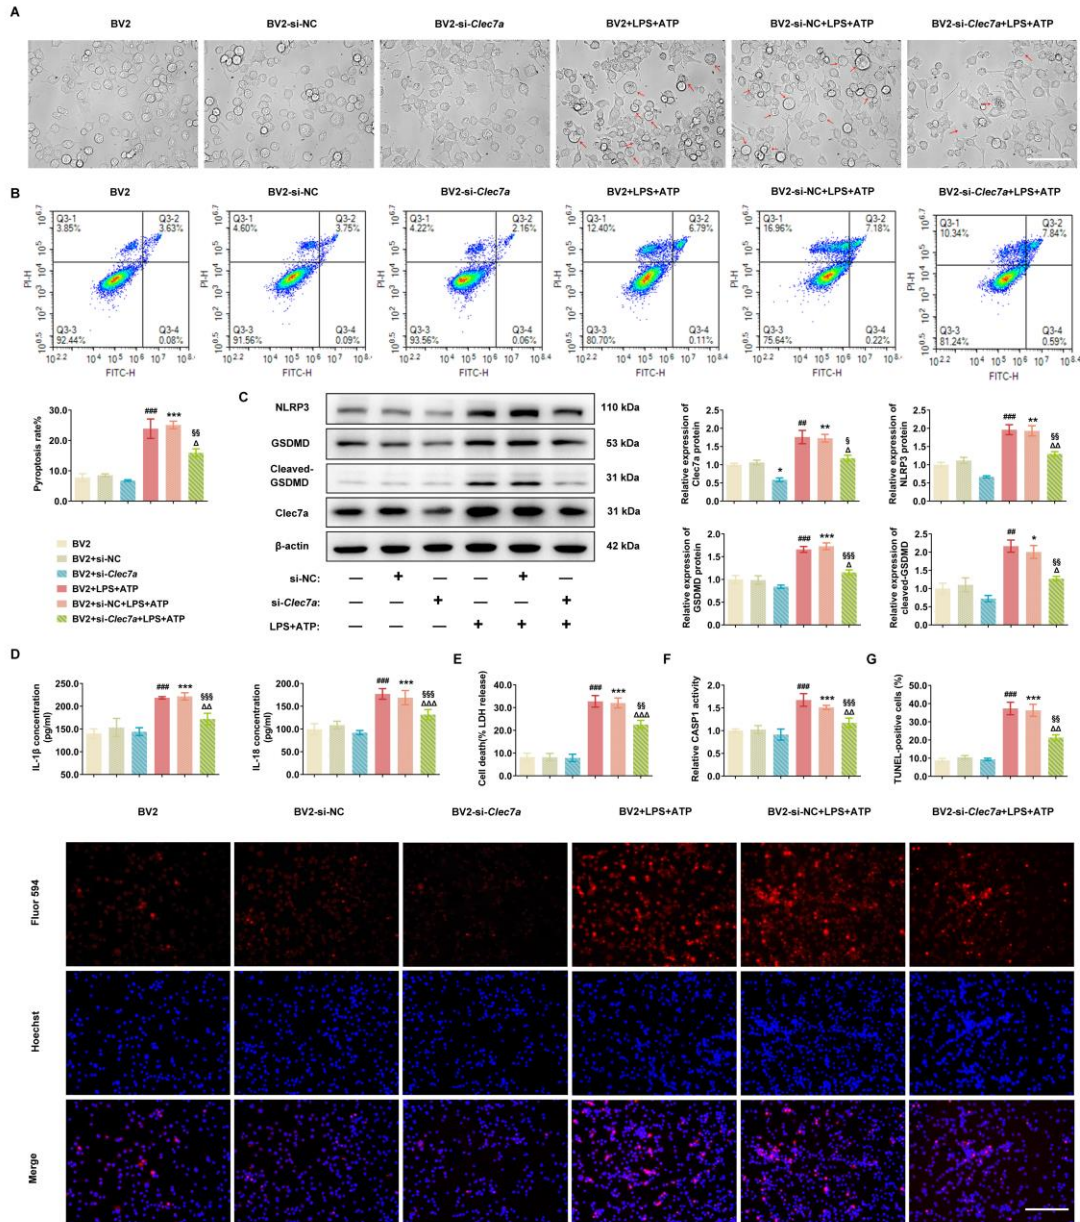

**Additional file 1: Figure S1. *Clec7a* knockdown alleviated LPS and ATP induced BV2 cells pyroptosis.** (A) Representative images of BV2 cells with or without siRNA transfection after the stimulation of LPS+ATP. Arrows point to the pyroptosis-like morphological changes. Scale bar: 500  $\mu$ m. (B) Pyroptosis was assessed by annexin V-FITC/PI assay after incubated with LPS+ATP in indicated groups (up: representative flow cytometric dotplots; down: quantification of annexin V-FITC and PI

double stained cells) ( $n = 3$  wells/group with 3 technical replicates). (C) Pyroptosis related proteins in cells treated with indicated components were evaluated by western blotting ( $n = 3$  independent blots). (D) The concentration of IL-1 $\beta$  and IL-18 in culture supernatants were assessed by ELISA ( $n = 3$  wells/group with 3 technical replicates). (E) LDH release in the culture supernatants of indicated groups were determined by colorimetry ( $n = 3$  wells/group with 3 technical replicates). (F) Caspase-1 activity in the cell lysis of indicated groups were determined by colorimetry ( $n = 3$  wells/group with 3 technical replicates). (G) Representative images (down) and quantification evaluation (up) of TUNEL staining cells in the indicated groups ( $n=3$  with 2 technical replicates). Red: TUNEL-positive cells; blue: nuclei (Hoechst 33258). Scale bar: 100  $\mu$ m. Data are presented as mean  $\pm$  SEM. One-way ANOVA was used for analysis followed by Tukey's post hoc test for equal variances or Dunnett T3 post hoc test for unequal variances. \* $P < 0.05$ , \*\* $P < 0.01$ , \*\*\* $P < 0.001$  compared with the BV2 group, # $P < 0.05$ , ## $P < 0.01$  compared with BV2+si-NC group.  $\Delta P < 0.05$ ,  $\Delta\Delta P < 0.01$ ,  $\Delta\Delta\Delta P < 0.001$  compared with BV2+si-NC+LPS+ATP group.

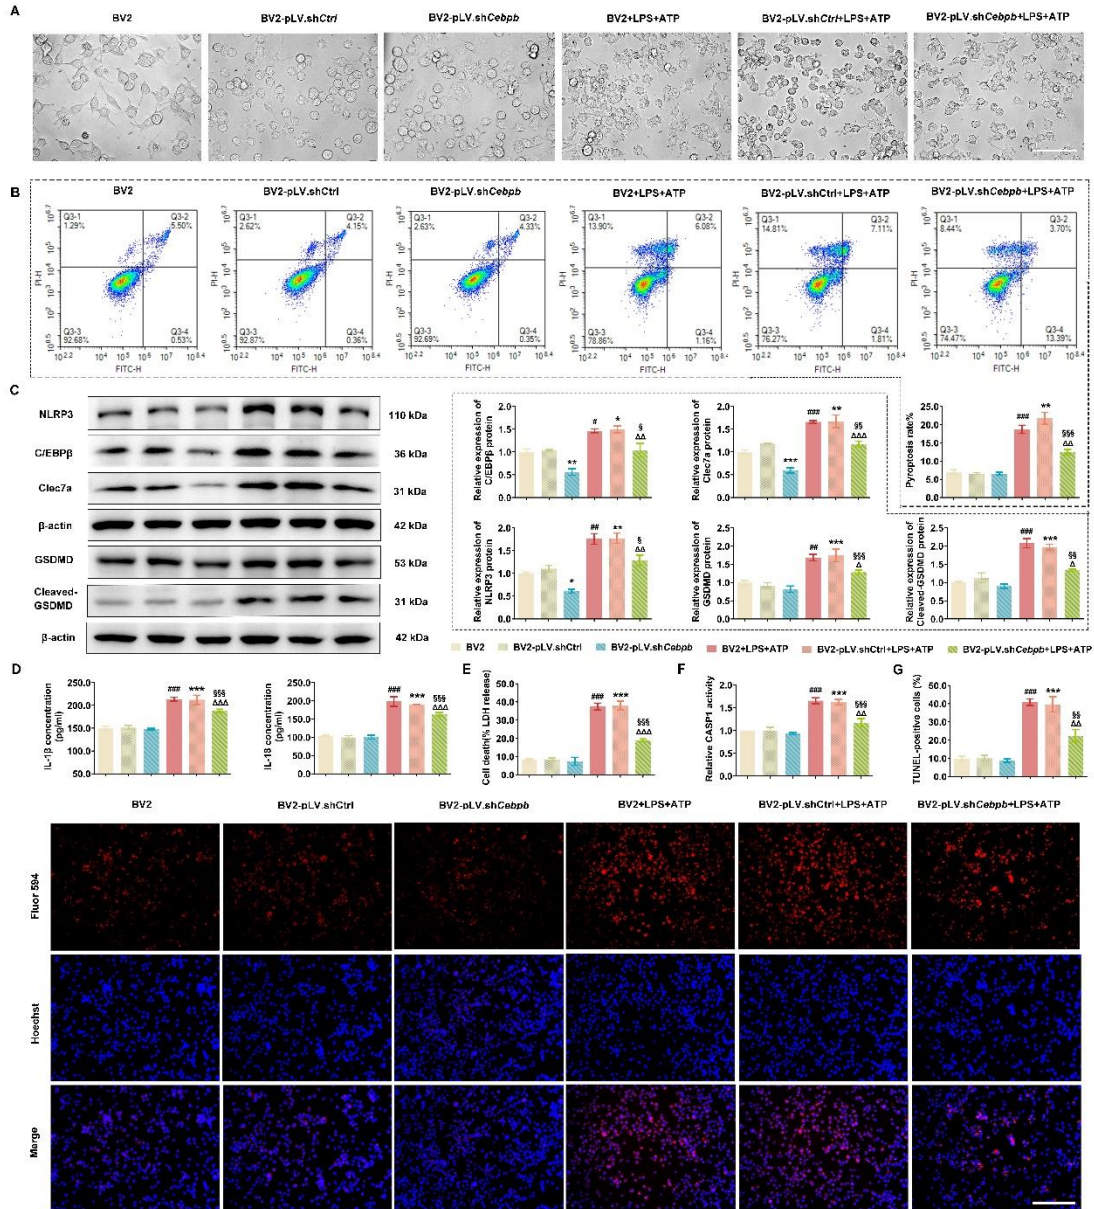

**Additional file 2: Figure S2. C/EBP $\beta$  knockdown alleviated LPS and ATP induced BV2 cells pyroptosis.** (A) Representative images of BV2 cells and BV2 transfected with pLV.shCtrl or pLV.shCebpb after the LPS+ATP treatments as indicated. Arrows point to the pyroptosis-like morphological changes. Scale bar: 500  $\mu$ m. (B) Pyroptosis was assessed by annexin V-FITC/PI assay after incubated with LPS+ATP in indicated groups (up: representative flow cytometric dotplots; down: quantification of annexin V-FITC and PI double stained cells) ( $n = 3$  wells/group with 3 technical replicates). (C)

Expression levels of pyroptosis-related proteins in cells treated with indicated components were evaluated by western blotting ( $n = 3$  independent blots). (D) The concentrations of IL-1 $\beta$  and IL-18 in culture supernatants were assessed by ELISA ( $n = 3$  wells/group with 3 technical replicates). (E) LDH release in the culture supernatants of indicated groups were determined by colorimetry ( $n = 3$  wells/group with 3 technical replicates). (F) Caspase-1 activity in the cell lysis of indicated groups were determined by colorimetry ( $n = 3$  wells/group with 3 technical replicates). (G) Representative images (down) and quantification evaluation (up) of TUNEL staining cells in indicated groups ( $n=3$  with 2 technical replicates). Red: TUNEL-positive cells; blue: nuclei (Hoechst 33258). Scale bar: 100  $\mu$ m. Data are presented as mean  $\pm$  SEM. One-way ANOVA was used for analysis followed by Tukey's post hoc test for equal variances or Dunnett T3 post hoc test for unequal variances. \* $P < 0.05$ , \*\*\* $P < 0.001$ , compared with BV2 group; # $P < 0.05$ , ## $P < 0.01$ , ### $P < 0.001$  compared with the BV2-pLV.shCtrl group.  $\Delta P < 0.05$ ,  $\Delta\Delta P < 0.01$ ,  $\Delta\Delta\Delta P < 0.001$  compared with BV2-pLV.shCtrl+LPS+ATP group.
