# Supplementary material for: Disruption of C/EBPβ-Clec7a axis exacerbates neuroinflammatory injury via NLRP3 inflammasome-mediated pyroptosis in experimental neuropathic pain
Source: Springer Nature journal article supplement (doi:10.1186/s12967-022-03779-9), 2022-12-12
Supplement: MOESM2 [file 23816270]

**Additional file 2: Table S1.**

The information of siRNA and primer sequences used in this study

| <b>Gene</b>             | <b>Forward (5'-3')</b>      | <b>Reverse (5'-3')</b>      |
|-------------------------|-----------------------------|-----------------------------|
| <i>Clec7a</i> -Rat-qPCR | TTCGGCACTCGAAACATCCA        | AGGGAGCCACCTTCTCATCT        |
| <i>ACTB</i> -Rat-qPCR   | ATGGATGACGATATCGCTGC        | CTTCTGACCCATACCCACCA        |
| <i>Clec7a</i> -siRNA    | GAGUUCAUUGAAAGCCAAATT       | UUUGGCUUUCAUGAACUCTT        |
| <i>Cebpb</i> -shRNA     | AGAACGAGCGGCUGCAGAATT       | UUCUGCAGCCGCUCGUUCUTT       |
| si-NC                   | UUCUCCGAACGUGUCACGUTT       | ACGUGACACGUUCGGAGAATT       |
| <i>Clec7a</i> -CHIP-q1  | ATGGGCCAGGGTCATCTTCC        | GCAGCGAGTGAGAGCCTTC         |
| <i>Clec7a</i> -CHIP-q2  | TGTTCTCCTTGTTGACTTACAGC     | GCACTGGCTTCATTCTTCTGGA      |
| <i>Clec7a</i> -CHIP-q3  | TTCGCTTTGTGTCGCTGGAG        | TATAACTGCCTGGAGTCGG         |
| <b>GAPDH-CHIP</b>       | <b>ACCAGGGAGGGCTGCAGTCC</b> | <b>TCAGTTCGGAGCCCACACGC</b> |

**Additional file 2: Table S2.**

The information of antibodies used in this study

| Method           | Antibody                           | Cat. No. | Dilution | Host   | Reactivity              | Brand                        | Previous publications or manufacturers                                                                                                                                                                                                                                                                                                                              |
|------------------|------------------------------------|----------|----------|--------|-------------------------|------------------------------|---------------------------------------------------------------------------------------------------------------------------------------------------------------------------------------------------------------------------------------------------------------------------------------------------------------------------------------------------------------------|
| Western blotting | Clec7a<br>(also known as Dectin-1) | A9883    | 1:1000   | Rabbit | Human,<br>Mouse,<br>Rat | Abclonal,<br>Wuhan,<br>China | <p>Tian X, Peng X, Lin J, et al. Isorhamnetin Ameliorates Aspergillus fumigatus Keratitis by Reducing Fungal Load, Inhibiting Pattern-Recognition Receptors and Inflammatory Cytokines. Invest Ophthalmol Vis Sci. 2021 Mar 1;62(3):38. PMID: 33783487; PMCID: PMC8010362.</p> 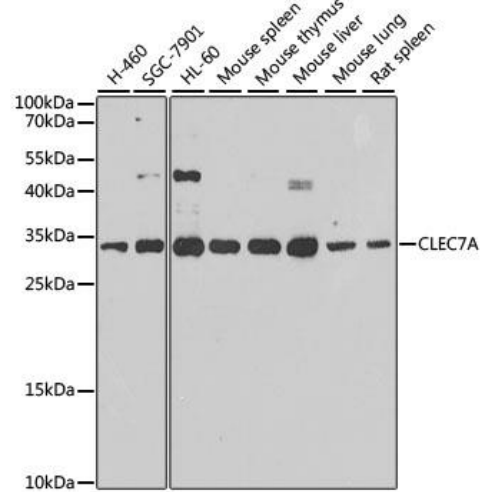 |

|  |                                    |          |        |        |                         |                              |                                                                                                                                                                                                                                                                                                                                                                                                                                              |
|--|------------------------------------|----------|--------|--------|-------------------------|------------------------------|----------------------------------------------------------------------------------------------------------------------------------------------------------------------------------------------------------------------------------------------------------------------------------------------------------------------------------------------------------------------------------------------------------------------------------------------|
|  | Clec7a<br>(also known as Dectin-1) | ab140039 | 1:1000 | Rabbit | Human,<br>Rat           | Abcam, MA,<br>USA            |  <p>Western blot - Anti-Dectin-1 antibody (ab140039)</p> <p>Lane 1 : Anti-Dectin-1 antibody (ab140039) at 1 µg/ml<br/>Lane 2 : Anti-Dectin-1 antibody (ab140039) at 2 µg/ml</p> <p>All lanes : Rat spleen tissue lysate</p> <p>Lysates/proteins at 15 µg per lane.</p> <p>Predicted band size: 28 kDa</p>                                                 |
|  | NLRP3                              | A5652    | 1:1000 | Rabbit | Human,<br>Mouse,<br>Rat | Abclonal,<br>Wuhan,<br>China | <p>Mi J, Yang Y, Yao H, et al. Inhibition of heat shock protein family A member 8 attenuates spinal cord ischemia-reperfusion injury via astrocyte NF-κB/NLRP3 inflammasome pathway : HSPA8 inhibition protects spinal ischemia-reperfusion injury. J Neuroinflammation. 2021 Aug 6;18(1):170. PMID: 34362408; PMCID: PMC8349068.</p> <p>Western blot analysis of extracts of Rat lung, using NLRP3 antibody (A5652) at 1:1000 dilution.</p> |

|  |               |        |        |        |       |          |                                                                                                                                                                                                                                                                                            |
|--|---------------|--------|--------|--------|-------|----------|--------------------------------------------------------------------------------------------------------------------------------------------------------------------------------------------------------------------------------------------------------------------------------------------|
|  |               |        |        |        |       |          | 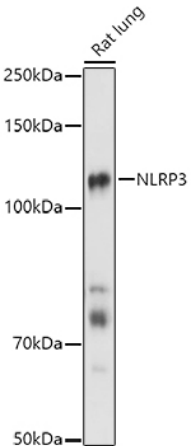                                                                                                                                                                                                        |
|  | Cleaved-GSDMD | 10137S | 1:1000 | Rabbit | Mouse | CST, USA | <p>Liu C, Cai B, Li D, Yao Y. Wolf-Hirschhorn syndrome candidate 1 facilitates alveolar macrophage pyroptosis in sepsis-induced acute lung injury through NEK7-mediated NLRP3 inflammasome activation. <i>Innate Immun.</i> 2021 Aug;27(6):437-447. PMID: 34428935; PMCID: PMC8504266.</p> |

|       |          |        |        |               |                   |                                                                                                                                                                                                                                                                                                                        |                                                                                                                                                                                                                                                                                                                                                                                                                                                                                      |
|-------|----------|--------|--------|---------------|-------------------|------------------------------------------------------------------------------------------------------------------------------------------------------------------------------------------------------------------------------------------------------------------------------------------------------------------------|--------------------------------------------------------------------------------------------------------------------------------------------------------------------------------------------------------------------------------------------------------------------------------------------------------------------------------------------------------------------------------------------------------------------------------------------------------------------------------------|
|       |          |        |        |               |                   |                                                                                                                                                                                                                                                                                                                        | 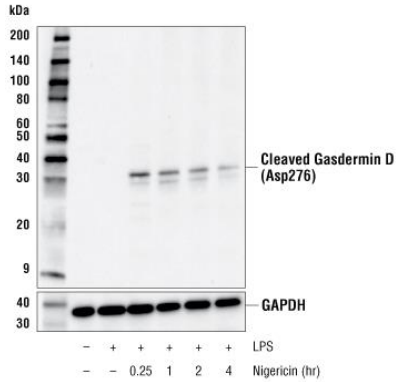 <p>Western blot analysis showing Cleaved Gasdermin D (Asp276) and GAPDH levels. The top panel shows Cleaved Gasdermin D (Asp276) bands at approximately 35 kDa, and the bottom panel shows GAPDH bands at approximately 35 kDa. The treatments are: LPS (-), LPS (+), LPS (+) + Nigericin (0.25 hr), LPS (+) + Nigericin (1 hr), LPS (+) + Nigericin (2 hr), and LPS (+) + Nigericin (4 hr).</p> |
| GSDMD | ab209845 | 1:1000 | Rabbit | Mouse,<br>Rat | Abcam, MA,<br>USA |  <p>Western blot - Anti-GSDMD antibody [EPR19828] (ab209845). Lanes 1-3: Anti-GSDMD antibody [EPR19828] (ab209845) at 1/1000 dilution. Predicted band size: 53 kDa. Observed band size: 53 kDa. anti-Actin ab179467. ab209845.</p> |                                                                                                                                                                                                                                                                                                                                                                                                                                                                                      |

|  |               |         |        |        |                         |                   |                                                                                                                                                                 |                                                                                                                                                                                                                                                                                    |
|--|---------------|---------|--------|--------|-------------------------|-------------------|-----------------------------------------------------------------------------------------------------------------------------------------------------------------|------------------------------------------------------------------------------------------------------------------------------------------------------------------------------------------------------------------------------------------------------------------------------------|
|  | C/EBP $\beta$ | ab32358 | 1:1000 | Rabbit | Human,<br>Mouse,<br>Rat | Abcam, MA,<br>USA | 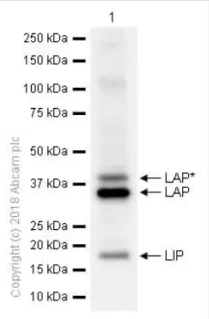 <p>Western blot - Anti-CEBP Beta antibody [E299] - C-terminal (ab32358)</p> | <p>Anti-CEBP Beta antibody [E299] (ab32358) at 1/1000 dilution + N embryonic fibroblast) whole cell <math>\mu</math>g</p> <p><b>Secondary</b><br/>Goat Anti-Rabbit IgG H&amp;L (HRP) 1/20000 dilution</p> <p><b>Predicted band size:</b> 36 kDa</p>                                |
|  |               |         |        |        |                         |                   |  <p>Western blot - Anti-CEBP Beta antibody [E299] - C-terminal (ab32358)</p> | <p>Anti-CEBP Beta antibody [E299] (ab32358) at 1/1000 dilution + adrenal gland pheochromocytoma lysates 15 <math>\mu</math>g at 15 <math>\mu</math>g</p> <p><b>Secondary</b><br/>Goat Anti-Rabbit IgG H&amp;L (HRP) 1/20000 dilution</p> <p><b>Predicted band size:</b> 36 kDa</p> |

|  |         |          |        |        |                                                                                                            |                            |                                                                                                                                                                                                                                                                                                                                                                                                                                                                                                                                                                                                                                                                                                                                                                                        |
|--|---------|----------|--------|--------|------------------------------------------------------------------------------------------------------------|----------------------------|----------------------------------------------------------------------------------------------------------------------------------------------------------------------------------------------------------------------------------------------------------------------------------------------------------------------------------------------------------------------------------------------------------------------------------------------------------------------------------------------------------------------------------------------------------------------------------------------------------------------------------------------------------------------------------------------------------------------------------------------------------------------------------------|
|  | GAPDH   | ab181602 | 1:5000 | Rabbit | Human,<br>Mouse,<br>Rat,<br>Chicken,<br>Zebrafish,<br>African<br>green<br>monkey,<br>Xenopus<br>tropicalis | Abcam, MA,<br>USA          | 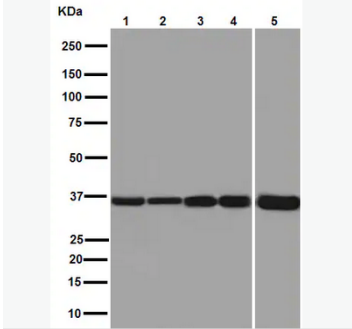 <p>Western blot - Anti-GAPDH antibody [EPR16891]<br/>- Loading Control (ab181602)</p> <p><b>All lanes</b> : Anti-GAPDH antibody<br/>Loading Control (ab181602) c</p> <p><b>Lane 1</b> : Mouse kidney lysates<br/><b>Lane 2</b> : Mouse spleen lysates<br/><b>Lane 3</b> : RAW 264.7 (Mouse m<br/>transformed with Abelson mu<br/>virus) whole cell lysates<br/><b>Lane 4</b> : PC-12 (Rat adrenal g<br/>pheochromocytoma) whole<br/><b>Lane 5</b> : Rat brain lysates</p> <p>Lysates/proteins at 10 µg per</p> <p><b>Secondary</b><br/><b>All lanes</b> : Goat Anti-Rabbit Ig<br/>(H+L), Peroxidase conjugated</p> <p><b>Predicted band size:</b> 36 kDa<br/><b>Observed band size:</b> 36 kDa</p> |
|  | β-actin | BM3873   | 1:2000 | Rabbit | Human,<br>Mouse,<br>Rat,<br>Zebrafish,<br>Monkey                                                           | BOSTER,<br>Wuhan,<br>China |  <p>Western blot analysis of beta Actin expression in (1)HeLa cell lysate; (2)Human fetal kidney lysate; (3) NIH/3T3 cell lysate; (4) PC-12 cell lysate.</p>                                                                                                                                                                                                                                                                                                                                                                                                                                                                                                                                       |

|  |      |           |        |        |                         |                                  |                                                                                                                                                                                                                                                                                                                                                                                                           |
|--|------|-----------|--------|--------|-------------------------|----------------------------------|-----------------------------------------------------------------------------------------------------------------------------------------------------------------------------------------------------------------------------------------------------------------------------------------------------------------------------------------------------------------------------------------------------------|
|  | pSyk | MA5-14918 | 1:1000 | Rabbit | Human,<br>Mouse,<br>Rat | Thermo<br>Scientific, CA,<br>USA | 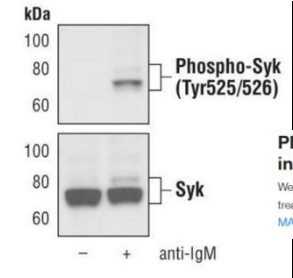 <p><b>Phospho-Syk (Tyr525, Tyr526) Antibody (MA5-14918) in WB</b></p> <p>Western blot analysis of Phospho-Syk pTyr525/526 in extracts from Ramos cells, untreated or treated with anti-IgM, using Phospho-Syk pTyr525/526 monoclonal antibody (Product # MA5-14918) (upper) or a Syk polyclonal antibody (lower).</p> |
|  | Syk  | D3Z1E     | 1:1000 | Rabbit | Human,<br>Mouse,<br>Rat | CST, USA                         |  <p>Western blot analysis of Syk protein in extracts from SW620, SR, A20, and YB20 cells. Molecular weight markers are shown on the left (kDa).</p>                                                                                                                                                                    |
|  | pERK | P63086    | 1:1000 | Rabbit | Human,<br>Mouse,<br>Rat | RayBiotech<br>USA                | <p>Volmer, Romain et al. "Borna disease virus blocks potentiation of presynaptic activity through inhibition of protein kinase C signaling." PLoS pathogens vol. 2,3 (2006): e19. PMID: 16552443; PMCID: PMC1401496.</p>                                                                                                                                                                                  |



|  |      |        |        |        |                         |                              |                                                                                                                                                                                               |
|--|------|--------|--------|--------|-------------------------|------------------------------|-----------------------------------------------------------------------------------------------------------------------------------------------------------------------------------------------|
|  |      |        |        |        |                         |                              | <p><b>A</b></p> <p>Western blot analysis of extracts from C6 cells untreated or treated with anisomycin using Phospho-JNK1-T183/Y185 + JNK2-T183/Y185 + JNK3-T221/Y223 Antibody (AP0276).</p> |
|  | ERK  | A4782  | 1:1000 | Rabbit | Human,<br>Mouse,<br>Rat | Abclonal,<br>Wuhan,<br>China |                                                                                                                                                                                               |
|  | pJNK | AP0276 | 1:1000 | Rabbit | Human,<br>Mouse,<br>Rat | Abclonal,<br>Wuhan,<br>China | Western blot analysis of extracts from C6 cells untreated or treated with anisomycin using Phospho-JNK1-T183/Y185 + JNK2-T183/Y185 + JNK3-T221/Y223 Antibody (AP0276).                        |

|     |          |        |        |                                                                                                                            |                   |                                                                                                                                                                                                                                                                                                                                                                                                                                                                                                                                                                                                                                                                                                      |                                                                                                                                                             |
|-----|----------|--------|--------|----------------------------------------------------------------------------------------------------------------------------|-------------------|------------------------------------------------------------------------------------------------------------------------------------------------------------------------------------------------------------------------------------------------------------------------------------------------------------------------------------------------------------------------------------------------------------------------------------------------------------------------------------------------------------------------------------------------------------------------------------------------------------------------------------------------------------------------------------------------------|-------------------------------------------------------------------------------------------------------------------------------------------------------------|
|     |          |        |        |                                                                                                                            |                   |                                                                                                                                                                                                                                                                                                                                                                                                                                                                                                                                                                                                                                                                                                      | <p>95kDa<br/>72kDa<br/>55kDa<br/>43kDa<br/>34kDa</p> <p>p-JNK1-T183/Y185 +<br/>JNK2-T183/Y185 +<br/>JNK3-T221/Y223</p> <p>β-actin</p> <p>+ - Anisomycin</p> |
| JNK | ab179461 | 1:1000 | Rabbit | Human,<br>Mouse,<br>Rat,<br>Chicken,<br>Cow,<br>Dog,<br>Zebrafish,<br>African<br>green<br>monkey,<br>Xenopus<br>tropicalis | Abcam, MA,<br>USA | <p>250 kDa<br/>150 kDa<br/>100 kDa<br/>75 kDa<br/>50 kDa<br/>37 kDa<br/>25 kDa<br/>20 kDa<br/>15 kDa<br/>10 kDa</p> <p>1 2 3</p> <p>JNK p54<br/>JNK p46</p> <p>Copyright © 2014 Abcam plc</p> <p><b>Western blot - Anti-JNK1 + JNK2 + JNK3 antibody [EPR16797-211] (ab179461)</b></p> <p>All lanes : Anti-JNK1 + JNK2 + JNK3 antibody [EPR16797-211] (ab179461) at 1/20000 dilution</p> <p><b>Lane 1</b> : K562 (Human chronic myelogenous leukemia cells from bone marrow) whole cell lysates<br/><b>Lane 2</b> : HeLa (Human epithelial cells from cervix adenocarcinoma) whole cell lysates<br/><b>Lane 3</b> : Jurkat (Human T cell leukemia cells from peripheral blood) whole cell lysates</p> |                                                                                                                                                             |

|                 |               |          |       |        |               |                                  |                                                                                                                                                                                                                                                                                                   |
|-----------------|---------------|----------|-------|--------|---------------|----------------------------------|---------------------------------------------------------------------------------------------------------------------------------------------------------------------------------------------------------------------------------------------------------------------------------------------------|
| Immunochemistry | Clec7a        | ab140039 | 1:100 | Rabbit | Human,<br>Rat | Abcam, MA,<br>USA                | 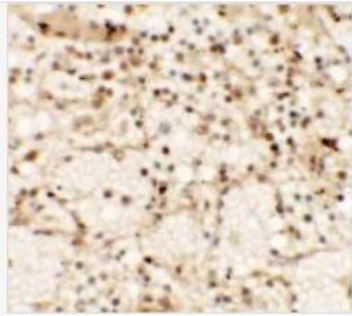 <p>Immunohistochemistry (Formalin/PFA-fixed paraffin-embedded sections) - Anti-Dectin-1 antibody (ab140039)</p>                                                                                               |
|                 | C/EBP $\beta$ | MA1-827  | 1:200 | Mouse  | Mouse,<br>Rat | Thermo<br>Scientific, CA,<br>USA | <p>Liu Q, Zhu Y, Yong WK, et al. Cutting Edge: Synchronization of IRF1, JunB, and C/EBP<math>\beta</math> Activities during TLR3-TLR7 Cross-Talk Orchestrates Timely Cytokine Synergy in the Proinflammatory Response. J Immunol. 2015 Aug 1;195(3):801-5. PMID: 26109639; PMCID: PMC4505950.</p> |

|                    |        |          |       |        |                   |                           |                                                                                                                                                                                                                                                                                                                                                                                                                                                |
|--------------------|--------|----------|-------|--------|-------------------|---------------------------|------------------------------------------------------------------------------------------------------------------------------------------------------------------------------------------------------------------------------------------------------------------------------------------------------------------------------------------------------------------------------------------------------------------------------------------------|
| Immunofluorescence | Clec7a | ab140039 | 1:50  | Rabbit | Human, Rat        | Abcam, MA, USA            | 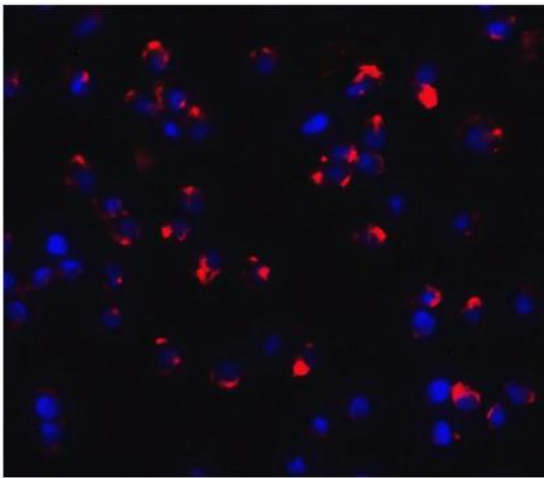 <p>Immunocytochemistry/ Immunofluorescence - Anti-Dectin-1 antibody (ab140039)</p>                                                                                                                                                                                                                                                                         |
|                    | NLRP3  | AF2155   | 1:50  | Rabbit | Human, Mouse, Rat | Beyotime, Shanghai, China |   <p>Fig. 1. ICC staining NLRP3 in PMVEC cells (green). The nuclear counter stain is DAPI (blue). Cells were fixed in paraformaldehyde, permeabilised with 0.25% Triton X-100/PBS.</p> <p>Fig. 2. Immunohistochem embedded mouse bladder antibody. Counter stained</p> |
|                    | Iba-1  | ab283319 | 1:100 | Mouse  | Human, Mouse, Rat | Abcam, MA, USA            |                                                                                                                                                                                                                                                                                                                                                                                                                                                |

|  |      |      |       |       |                         |          |                                                                                                                                                                                                                                                                                                                                                                                                                                                                                                                                                                                                                                                                                                                                                                                                                                                                                                                                                                                                                                                                                                                                                                                                                                                                                                                                                                                                            |
|--|------|------|-------|-------|-------------------------|----------|------------------------------------------------------------------------------------------------------------------------------------------------------------------------------------------------------------------------------------------------------------------------------------------------------------------------------------------------------------------------------------------------------------------------------------------------------------------------------------------------------------------------------------------------------------------------------------------------------------------------------------------------------------------------------------------------------------------------------------------------------------------------------------------------------------------------------------------------------------------------------------------------------------------------------------------------------------------------------------------------------------------------------------------------------------------------------------------------------------------------------------------------------------------------------------------------------------------------------------------------------------------------------------------------------------------------------------------------------------------------------------------------------------|
|  |      |      |       |       |                         |          | 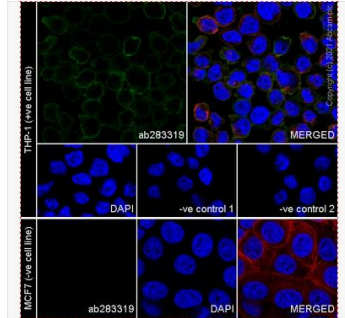 <p>Immunofluorescent analysis of Paraformaldehyde-fixed, 0.1% permeabilized THP-1 cells labeled with ab283319 at 1/100 (11.36 ug/ml) followed by ab150113 Goat Anti-H&amp;L (Alexa Fluor® 488) antibody dilution (Green). ab179513 Anti-rabbit monoclonal antibody was used to counterstain tubulin at 1/200 dilution. Nuclear counterstain was DAPI. Image showing cytoplasmic staining in THP-1 cells.</p> <p><b>Negative control:</b> MCF7</p> <p>Secondary antibody only control antibody is ab150113 Goat Anti-H&amp;L (Alexa Fluor® 488) at 1/1000 dilution.</p>  <p>Immunohistochemical analysis of embedded rat cerebrum tissue with ab283319 at 1/10000 (0.11 ug/ml) followed by a ready-to-use Leica BOND™ Polymer Refine Detection kit. Staining on the microglia in rat brain section was incubated with ab283319 at room temperature and mouse-specific IgG antibody (45 mins). The immunostaining was counterstained with Hematoxylin. Leica Biosystems BOND® RX Instrument. Counterstained with Hematoxylin.</p> <p>Secondary antibody only control antibody is a ready-to-use Leica BOND™ Polymer Refine Detection kit.</p> <p>Heat-mediated antigen retrieval buffer (pH 6.0, epitope retrieval time 15 mins).</p> |
|  | GFAP | 3670 | 1:100 | Mouse | Human,<br>Mouse,<br>Rat | CST, USA | <p>Leinster VHL, Phillips TJ, et al. Cortical cells are altered by factors including bone morphogenetic protein released from a placental barrier model under altered oxygenation. <i>Neuronal Signal</i>. 2020 Apr 9;4(1):NS20190148. PMID: 32714599; PMCID: PMC7363303.</p>                                                                                                                                                                                                                                                                                                                                                                                                                                                                                                                                                                                                                                                                                                                                                                                                                                                                                                                                                                                                                                                                                                                              |

|  |      |          |       |       |                         |                   |                                                                                                                                                                                                                                                                                      |
|--|------|----------|-------|-------|-------------------------|-------------------|--------------------------------------------------------------------------------------------------------------------------------------------------------------------------------------------------------------------------------------------------------------------------------------|
|  |      |          |       |       |                         |                   |                                                                                                                                                                                                                                                                                      |
|  | NeuN | ab104224 | 1:100 | Mouse | Human,<br>Mouse,<br>Rat | Abcam, MA,<br>USA | <p>Immunocytochemistry - Anti-NeuN antibody [1B7] - Neuronal Marker (ab104224)</p> <p>Rat brain neural cultures stained in pink, with ab4674 (chicken anti-rat GFAP) in green and DNA in blue. It reveals strong nuclear and cytoplasmic staining. It does not stain astrocytes.</p> |

|  |                                                                         |                 |              |             |               |                           |                                                                                      |
|--|-------------------------------------------------------------------------|-----------------|--------------|-------------|---------------|---------------------------|--------------------------------------------------------------------------------------|
|  | <p>Goat<br/>Anti-Mouse<br/>IgG H&amp;L<br/>(Alexa Fluor®<br/>488)</p>   | <p>ab150113</p> | <p>1:500</p> | <p>Goat</p> | <p>Mouse</p>  | <p>Abcam, MA,<br/>USA</p> | 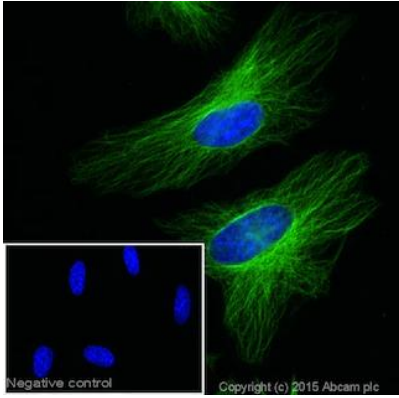  |
|  | <p>Goat<br/>Anti-Rabbit<br/>IgG H&amp;L (Cy3<br/>®)<br/>preadsorbed</p> | <p>ab6939</p>   | <p>1:500</p> | <p>Goat</p> | <p>Rabbit</p> | <p>Abcam, MA,<br/>USA</p> |  |

**Additional file 2: Table S3. Expression patterns of 100 differentially expressed genes in SC between the sham and CCI model groups by Microarray Profiling (mixed sample, n=3)**

| <b>Gene Symbol</b> | <b>SC-Fold change (Mod/ Sham)</b> | <b> SC-log2 (Sham/Mod) </b> | <b>Dysregulation Patterns</b> |
|--------------------|-----------------------------------|-----------------------------|-------------------------------|
| Cxcl13             | 12.63686944                       | 3.6595672                   | Up                            |
| Reg3b              | 10.453195                         | 3.385872                    | Up                            |
| Clec7a             | 6.5039538                         | 2.701317                    | Up                            |
| Ccl2               | 4.3116737                         | 2.108248                    | Up                            |
| Vom2r7             | 0.291312821                       | 1.779358896                 | Down                          |
| Hamp               | 3.2359807                         | 1.695203                    | Up                            |
| Olr1169            | 0.308880777                       | 1.694878007                 | Down                          |
| Olr1564            | 0.317040617                       | 1.657260416                 | Down                          |
| Usp18              | 0.319336401                       | 1.646851079                 | Down                          |
| Olr1052            | 0.33372207                        | 1.583280996                 | Down                          |
| Olr1274            | 0.33454991                        | 1.57970664                  | Down                          |
| Sprr1a             | 2.8110654                         | 1.491117                    | Up                            |
| Expi               | 0.36093                           | 1.470209032                 | Down                          |
| Irf7               | 0.36204                           | 1.465779                    | Down                          |
| Apold1             | 0.3656763                         | 1.451361                    | Down                          |



---

|           |           |          |      |
|-----------|-----------|----------|------|
| Isg15     | 0.3904915 | 1.356637 | Down |
| Il18rap   | 2.490318  | 1.31633  | Up   |
| Serpina3n | 2.458571  | 1.29782  | Up   |
| Gal       | 2.4365891 | 1.284863 | Up   |
| Alb       | 0.4133971 | 1.2744   | Down |
| Oas1i     | 0.4289769 | 1.221028 | Down |
| Usp18     | 0.4331921 | 1.206921 | Down |
| Csrp3     | 2.2698044 | 1.182568 | Up   |
| Atf3      | 2.1963774 | 1.135126 | Up   |
| Tslp      | 2.1824128 | 1.125924 | Up   |
| LOC681283 | 2.1732829 | 1.119876 | Up   |
| RT1-Da    | 2.1197704 | 1.083908 | Up   |
| Mx2       | 0.4950064 | 1.014481 | Down |
| Rtp4      | 0.5025026 | 0.992797 | Down |
| RT1-Ba    | 1.987886  | 0.991235 | Up   |
| Reg3a     | 1.984784  | 0.988982 | Up   |
| Cd74      | 1.9775223 | 0.983694 | Up   |
| Serpina1  | 1.9683953 | 0.97702  | Up   |

---

---

|              |           |          |      |
|--------------|-----------|----------|------|
| A2ld1        | 1.9285987 | 0.947553 | Up   |
| Stc1         | 0.5318974 | 0.91078  | Down |
| RGD1309808   | 0.5326796 | 0.90866  | Down |
| Cx3cr1       | 1.8650599 | 0.899222 | Up   |
| Fxyd5        | 1.8557289 | 0.891986 | Up   |
| Ntng1        | 0.5412537 | 0.885623 | Down |
| Gpr34        | 1.8366847 | 0.877104 | Up   |
| LOC100360522 | 1.8355215 | 0.87619  | Up   |
| LOC100911291 | 1.8192603 | 0.863352 | Up   |
| Smad9        | 0.5523773 | 0.856274 | Down |
| Nfam1        | 1.8035795 | 0.850863 | Up   |
| Apobec1      | 1.79721   | 0.845759 | Up   |
| LOC681204    | 1.7841081 | 0.835203 | Up   |
| LOC100363064 | 1.7760596 | 0.82868  | Up   |
| Slc16a14     | 0.5635342 | 0.827425 | Down |
| Ifit1        | 0.5682186 | 0.815482 | Down |
| RT1-DMb      | 1.7570217 | 0.813132 | Up   |
| Tyrobp       | 1.7412616 | 0.800133 | Up   |

---

---

|            |           |          |      |
|------------|-----------|----------|------|
| Oasl       | 0.578894  | 0.788629 | Down |
| RGD1566383 | 1.7085885 | 0.772805 | Up   |
| Oasl2      | 0.5944713 | 0.750321 | Down |
| RGD1560815 | 1.6582528 | 0.729664 | Up   |
| Ifit2      | 0.6073104 | 0.719494 | Down |
| Lyz2       | 1.6418758 | 0.715345 | Up   |
| Rac2       | 1.6367909 | 0.71087  | Up   |
| Tubb6      | 1.636767  | 0.710849 | Up   |
| LOC686123  | 1.6361023 | 0.710263 | Up   |
| Csf2rb     | 1.6313236 | 0.706043 | Up   |
| LOC679711  | 0.6148639 | 0.701661 | Down |
| Itgam      | 1.6250364 | 0.700472 | Up   |
| Il18       | 1.6232228 | 0.698861 | Up   |
| Sidt1      | 0.6184869 | 0.693185 | Down |
| Ifih1      | 0.6239849 | 0.680417 | Down |
| Pou2f2     | 1.5997816 | 0.677875 | Up   |
| Mrgprb4    | 0.6255842 | 0.676724 | Down |
| Pglyrp3    | 0.626179  | 0.675353 | Down |

---

---

|           |           |          |      |
|-----------|-----------|----------|------|
| Dapp1     | 1.5878845 | 0.667106 | Up   |
| Kcnk18    | 0.6309869 | 0.664318 | Down |
| Csf1r     | 1.5837153 | 0.663313 | Up   |
| Rpe65     | 0.6347714 | 0.655691 | Down |
| Fcgr2a    | 1.5695304 | 0.650333 | Up   |
| Tfec      | 1.5676582 | 0.648611 | Up   |
| P2ry13    | 1.5618761 | 0.64328  | Up   |
| Ly49s3    | 0.6441654 | 0.634497 | Down |
| Ms4a11    | 1.5475049 | 0.629944 | Up   |
| Lcp1      | 1.5442957 | 0.626949 | Up   |
| Timp1     | 1.5412854 | 0.624134 | Up   |
| LOC310177 | 1.5360967 | 0.619269 | Up   |
| Vav1      | 1.5355654 | 0.61877  | Up   |
| Olr1069   | 1.5335562 | 0.616881 | Up   |
| Tgfb1     | 1.5288512 | 0.612448 | Up   |
| Cxcl10    | 0.6558328 | 0.6086   | Down |
| Cd4       | 1.5230085 | 0.606924 | Up   |
| LOC685987 | 1.5179697 | 0.602143 | Up   |

---

---

|            |           |          |      |
|------------|-----------|----------|------|
| Magee2     | 0.6592484 | 0.601106 | Down |
| Ddx58      | 0.6592977 | 0.600998 | Down |
| Ccr5       | 1.5164038 | 0.600654 | Up   |
| Fam111a    | 0.6603441 | 0.59871  | Down |
| Anxa3      | 1.5125858 | 0.597017 | Up   |
| Pcsk2      | 0.66186   | 0.595402 | Down |
| Clec2d     | 1.5085693 | 0.593181 | Up   |
| Ptpn6      | 1.5070246 | 0.591703 | Up   |
| RGD1561086 | 1.5049452 | 0.589711 | Up   |
| Gbp4       | 0.6649317 | 0.588722 | Down |
| Olr551     | 1.5035689 | 0.588391 | Up   |
| RGD1564324 | 1.5021126 | 0.586993 | Up   |
| Lptm5      | 1.5007243 | 0.585659 | Up   |

---

**Additional file 2: Table S4. Expression patterns of 100 differentially expressed genes in SC between the sham and CCI model groups by RNA-seq (n=4)**

| <b>Gene Symbol</b> | <b>Sham-average</b> | <b>CCI-average</b> | <b>Fold change(Model/Sham)</b> | <b>Regulation</b> | <b>P.Value</b> |
|--------------------|---------------------|--------------------|--------------------------------|-------------------|----------------|
| <i>Nlrp3</i>       | 7.25                | 360                | 49.6552                        | Up                | 0.027217       |
| <i>Ddx17</i>       | 158.75              | 6281               | 39.5654                        | Up                | 0.020881954    |
| <i>Cacna2d1</i>    | 6                   | 181.25             | 30.2083                        | Up                | 0.026828546    |
| <i>Limk1</i>       | 4417                | 253                | -17.4585                       | Down              | 0.000366165    |
| <i>Dock6</i>       | 27                  | 389.5              | 14.4259                        | Up                | 0.026711804    |
| <i>Atf3</i>        | 61.25               | 794.25             | 12.9673                        | Up                | 0.002799736    |
| <i>Clec7a</i>      | 21                  | 257                | 12.2381                        | Up                | 0.008697782    |
| <i>Slc41a3</i>     | 89.75               | 7.25               | -12.3793                       | Down              | 0.00122233     |
| <i>Ccl2</i>        | 19.25               | 210.5              | 10.9351                        | Up                | 0.014396435    |
| <i>Wdr18</i>       | 111.75              | 11                 | -10.1591                       | Down              | 0.022777859    |
| <i>Gpr3</i>        | 13                  | 111                | 8.5385                         | Up                | 0.025625662    |
| <i>Cxcl13</i>      | 69.5                | 549                | 7.8993                         | Up                | 0.007413509    |
| <i>Reg3b</i>       | 112.5               | 726.5              | 6.4578                         | Up                | 0.00327874     |
| <i>Atf1</i>        | 234.25              | 36.25              | -6.4621                        | Down              | 0.04522935     |
| <i>Trmt5</i>       | 561                 | 90.75              | -6.1818                        | Down              | 0.036085811    |

|                       |        |        |        |    |             |
|-----------------------|--------|--------|--------|----|-------------|
| <i>Aoah</i>           | 19.25  | 113.75 | 5.9091 | Up | 0.010274523 |
| <i>RT1 DMB</i>        | 4.25   | 24.5   | 5.7647 | Up | 0.000365273 |
| <i>Abcg3l1</i>        | 8.25   | 46.75  | 5.6667 | Up | 0.001681187 |
| <i>Pold2</i>          | 14     | 75.5   | 5.3929 | Up | 0.034123136 |
| <i>Phldb2</i>         | 86     | 432.5  | 5.0291 | Up | 0.01349678  |
| <i>Adgrg5</i>         | 13     | 64.5   | 4.9615 | Up | 0.003349098 |
| <i>Ank2</i>           | 25.25  | 124.75 | 4.9406 | Up | 0.006499653 |
| <i>Aifm1</i>          | 264.75 | 1303   | 4.9216 | Up | 0.000117058 |
| <i>LOC100910270</i>   | 253.25 | 1243.5 | 4.9102 | Up | 0.000578777 |
| <i>AABR07025896.1</i> | 2.5    | 12.25  | 4.9    | Up | 0.010337416 |
| <i>Il18rap</i>        | 40.25  | 192.5  | 4.7826 | Up | 0.000546411 |
| <i>Mis18bp1</i>       | 6      | 28.25  | 4.7083 | Up | 0.033601633 |
| <i>Dock11</i>         | 300.75 | 1389.5 | 4.6201 | Up | 0.024427212 |
| <i>Aldh3a1</i>        | 3.5    | 16     | 4.5714 | Up | 0.005282585 |
| <i>Tfec</i>           | 17.5   | 78.25  | 4.4714 | Up | 0.014863585 |
| <i>Stpg1</i>          | 17.5   | 75.5   | 4.3143 | Up | 0.013288392 |
| <i>Tmem144</i>        | 57.75  | 242.75 | 4.2035 | Up | 0.018069545 |
| <i>Trpc6</i>          | 137.25 | 576    | 4.1967 | Up | 0.001008163 |

|                     |        |          |        |    |             |
|---------------------|--------|----------|--------|----|-------------|
| <i>Acpp</i>         | 16.75  | 69.5     | 4.1493 | Up | 0.001260544 |
| <i>Clec12a</i>      | 101.25 | 370      | 3.6543 | Up | 0.000377991 |
| <i>Scimp</i>        | 4.5    | 16.25    | 3.6111 | Up | 0.002667134 |
| <i>Il6</i>          | 13.25  | 47.75    | 3.6038 | Up | 0.00044409  |
| <i>3-Mar</i>        | 5.5    | 19.75    | 3.5909 | Up | 0.025505106 |
| <i>Lrrc20</i>       | 47.25  | 169.5    | 3.5873 | Up | 0.034298421 |
| <i>Csf2rb</i>       | 357    | 1280.5   | 3.5868 | Up | 0.001546693 |
| <i>Tspan9</i>       | 847.75 | 3015     | 3.5565 | Up | 0.012887657 |
| <i>Traf3</i>        | 2.25   | 8        | 3.5556 | Up | 0.002207126 |
| <i>Mmp10</i>        | 8      | 28.25    | 3.5312 | Up | 0.04965938  |
| <i>Fcnb</i>         | 16     | 55.25    | 3.4531 | Up | 0.001444493 |
| <i>Mtmr1</i>        | 543    | 1871.25  | 3.4461 | Up | 0.02559201  |
| <i>Grhl3</i>        | 45.75  | 156.5    | 3.4208 | Up | 0.006936756 |
| <i>Cd6</i>          | 24.25  | 82.75    | 3.4124 | Up | 0.029934899 |
| <i>Hamp</i>         | 13     | 44.25    | 3.4038 | Up | 0.004685636 |
| <i>C4b</i>          | 907    | 3067     | 3.3815 | Up | 0.000380506 |
| <i>LOC103689965</i> | 3579.5 | 11982.75 | 3.3476 | Up | 3.47917E-05 |
| <i>Pax8</i>         | 2.25   | 7.25     | 3.2222 | Up | 0.037499916 |



|                       |         |         |         |      |             |
|-----------------------|---------|---------|---------|------|-------------|
| <i>Cfd</i>            | 2.25    | 7.25    | 3.2222  | Up   | 0.040493553 |
| <i>Hcst</i>           | 9.25    | 29.75   | 3.2162  | Up   | 0.013186353 |
| <i>Tmem217</i>        | 2.5     | 8       | 3.2     | Up   | 0.047459447 |
| <i>RGD1561662</i>     | 34      | 108.5   | 3.1912  | Up   | 0.039741663 |
| <i>Dlg3</i>           | 2752.25 | 866.5   | -3.1763 | Down | 0.014387746 |
| <i>Rps24</i>          | 2621    | 8307    | 3.1694  | Up   | 0.044079443 |
| <i>Nrg1</i>           | 15      | 47      | 3.1333  | Up   | 0.001210881 |
| <i>Ms4a7</i>          | 5       | 15.5    | 3.1     | Up   | 0.046421082 |
| <i>Cdkl3</i>          | 136.5   | 417.75  | 3.0604  | Up   | 0.016127996 |
| <i>Filip1</i>         | 1.75    | 5.25    | 3       | Up   | 0.041390044 |
| <i>Epb41</i>          | 0.5     | 1.5     | 3       | Up   | 0.049074512 |
| <i>Matn1</i>          | 23.75   | 8       | -2.9688 | Down | 0.000200369 |
| <i>Anxa3</i>          | 256.5   | 754.5   | 2.9415  | Up   | 0.001936808 |
| <i>Jup</i>            | 47      | 138     | 2.9362  | Up   | 0.032936928 |
| <i>AABR07043115.1</i> | 6.75    | 19.75   | 2.9259  | Up   | 0.025979578 |
| <i>AC132720.2</i>     | 6.5     | 19      | 2.9231  | Up   | 0.042788415 |
| <i>Il1b</i>           | 25.75   | 74.75   | 2.9029  | Up   | 0.015322608 |
| <i>C1qc</i>           | 2126.75 | 6168.25 | 2.9003  | Up   | 0.000312191 |

|                     |          |        |         |      |             |
|---------------------|----------|--------|---------|------|-------------|
| <i>Dmgdh</i>        | 7        | 20.25  | 2.8929  | Up   | 0.006303412 |
| <i>Bpifb5</i>       | 2.25     | 6.5    | 2.8889  | Up   | 0.047855506 |
| <i>Atp2b1</i>       | 9509.75  | 3309.5 | -2.8735 | Down | 0.014597784 |
| <i>Itgal</i>        | 587.25   | 1685   | 2.8693  | Up   | 0.000126381 |
| <i>Lilrb3a</i>      | 7        | 20     | 2.8571  | Up   | 0.01221508  |
| <i>Glmp</i>         | 10.5     | 29.5   | 2.8095  | Up   | 0.047111067 |
| <i>LOC108348139</i> | 5        | 14     | 2.8     | Up   | 0.007024643 |
| <i>Brca1</i>        | 151.25   | 54.25  | -2.788  | Down | 0.006089391 |
| <i>Aifm1</i>        | 1799.75  | 652.75 | -2.7572 | Down | 0.000784195 |
| <i>F10</i>          | 39.25    | 108    | 2.7516  | Up   | 0.001141333 |
| <i>LOC689064</i>    | 40.25    | 110.75 | 2.7516  | Up   | 0.023909017 |
| <i>Slc5a10</i>      | 2        | 5.5    | 2.75    | Up   | 0.039849286 |
| <i>Cyp26c1</i>      | 7.75     | 21.25  | 2.7419  | Up   | 0.009751576 |
| <i>C3</i>           | 12875.25 | 34705  | 2.6955  | Up   | 0.000363328 |
| <i>Lepr</i>         | 94       | 250.25 | 2.6622  | Up   | 0.0487574   |
| <i>Unc13d</i>       | 75.25    | 200.25 | 2.6611  | Up   | 0.01377725  |
| <i>Mefv</i>         | 113.25   | 300    | 2.649   | Up   | 0.001320787 |
| <i>Nol8</i>         | 6.25     | 16.5   | 2.64    | Up   | 0.03543862  |

|                       |         |          |         |      |             |
|-----------------------|---------|----------|---------|------|-------------|
| <i>Sctr</i>           | 10.75   | 28.25    | 2.6279  | Up   | 0.009390802 |
| <i>Ms4a6bl</i>        | 44.25   | 115.5    | 2.6102  | Up   | 0.013480328 |
| <i>Sag</i>            | 10.25   | 26.75    | 2.6098  | Up   | 0.038420386 |
| <i>Ddah2</i>          | 42.25   | 109.5    | 2.5917  | Up   | 0.018251581 |
| <i>Tlr8</i>           | 66      | 169.5    | 2.5682  | Up   | 0.012424392 |
| <i>RT1 A2</i>         | 531.5   | 1358.25  | 2.5555  | Up   | 0.010026734 |
| <i>Xpnpep1</i>        | 1988    | 781      | -2.5455 | Down | 0.033369082 |
| <i>C1qa</i>           | 4373.25 | 10969.25 | 2.5083  | Up   | 6.79946E-05 |
| <i>Cxcl6</i>          | 7.5     | 18.75    | 2.5     | Up   | 0.0319984   |
| <i>AABR07039806.1</i> | 10      | 25       | 2.5     | Up   | 0.045150879 |
| <i>Msln1</i>          | 22      | 55       | 2.5     | Up   | 0.000416436 |
| <i>Opn1sw</i>         | 5.75    | 14.25    | 2.4783  | Up   | 0.016900877 |
| <i>Ppp1r15a</i>       | 177.25  | 439      | 2.4767  | Up   | 0.00129702  |

---
